# Supplementary material for: Efficient Fe–Nx/C electrocatalyst for the oxygen reduction reaction derived from porphyrin-encapsulated zeolitic imidazolate frameworks
Source: Royal Society of Chemistry journal article supplement (doi:10.1039/d1nj00102g), 2021-01-01
Supplement: d1nj00102g1.pdf [file d1nj00102g1.pdf]

“Supplementary Information” for:

Efficient Fe-N<sub>x</sub>/C Electrocatalyst for Oxygen  
Reduction Reaction Derived from Porphyrin-  
Encapsulated Zeolitic Imidazolate Frameworks

*Jungwon Park,<sup>a†</sup> Byung Hoon Kim,<sup>c†</sup> Miyeon Kim<sup>a</sup>, Junyoung Mun,<sup>ab</sup> Chang Yeon Lee<sup>\*ab</sup>*

<sup>a</sup> Department of Energy and Chemical Engineering, Incheon National University, Incheon 22012, Republic of Korea. Email: [cylee@inu.ac.kr](mailto:cylee@inu.ac.kr)

<sup>b</sup> Innovation Center for Chemical Engineering, Incheon National University, Incheon 22012, Republic of Korea

<sup>c</sup> Department of Physics and Research Institute of Basic Science, Incheon National University, 12-1, Songdo-dong, Yeonsu-gu, Incheon, 22012, Republic of Korea

<sup>†</sup>These authors contributed equally to this work.

Corresponding authors: [cylee@inu.ac.kr](mailto:cylee@inu.ac.kr) (C. Y. L); Fax: +82-32-835-0797.

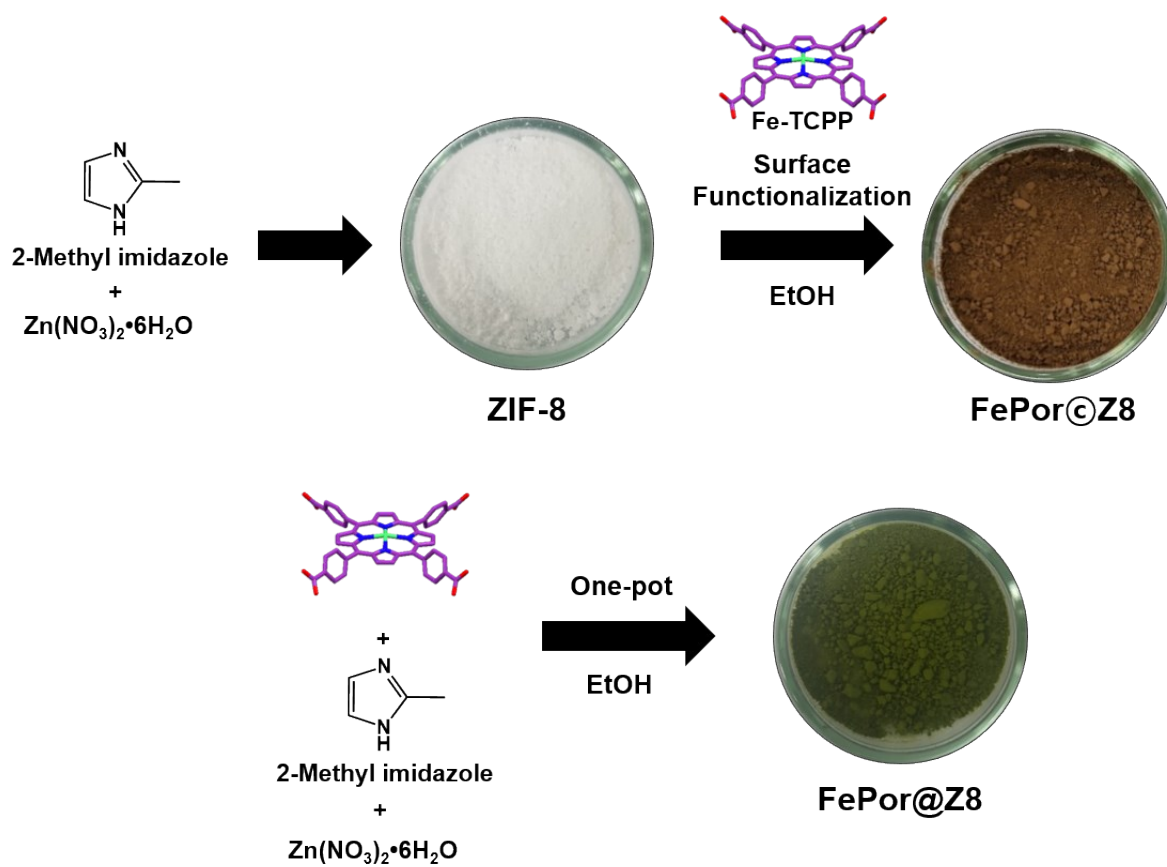

**Fig. S1.** Photograph images of FePor@Z8 and FePor@Z8.

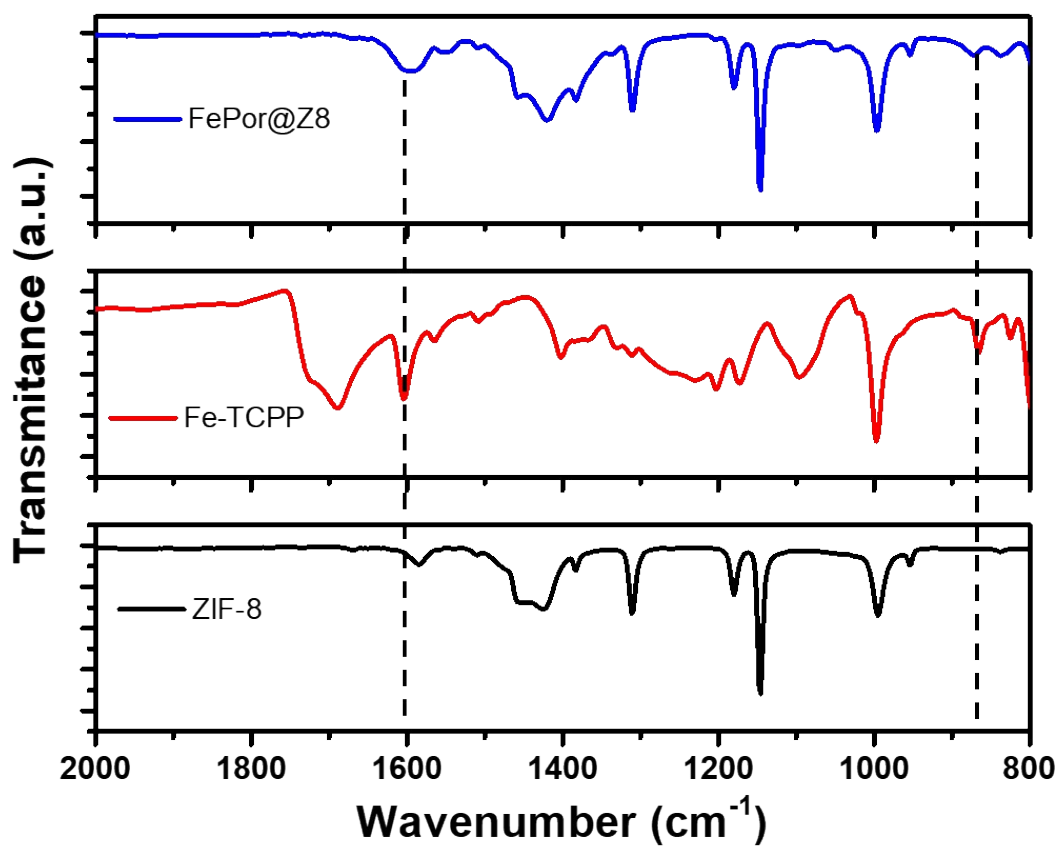

**Fig. S2.** FT-IR of ZIF-8, Fe-TCPP, and Fe-por@Z8. A dashed line is used to show the peaks derived from Fe-TCPP well.

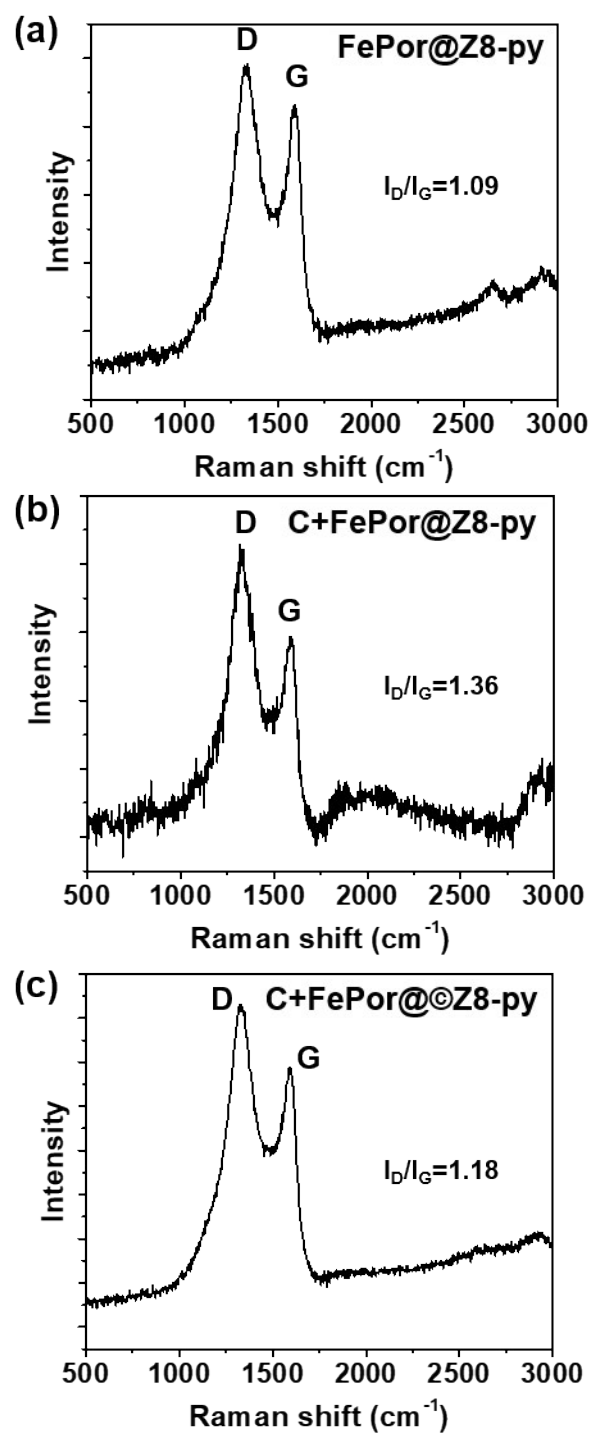

**Fig. S3.** Raman spectra of FePor@Z8-py, C+FePor@Z8-py, and C+FePor@©Z8-py.

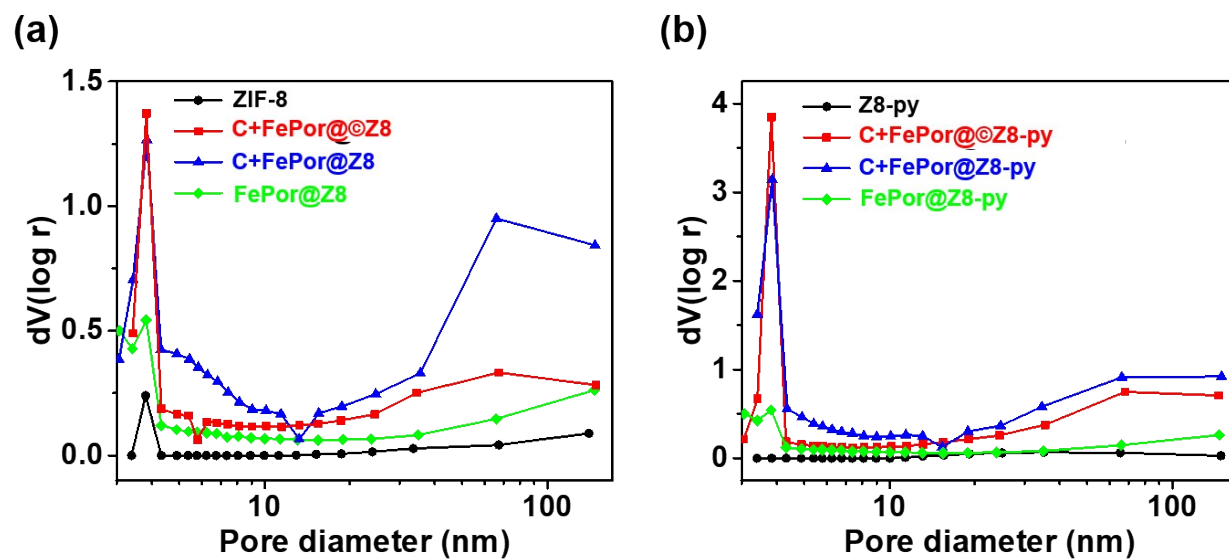

Fig. S4. Pore-size distribution of precursors and electrocatalysts.

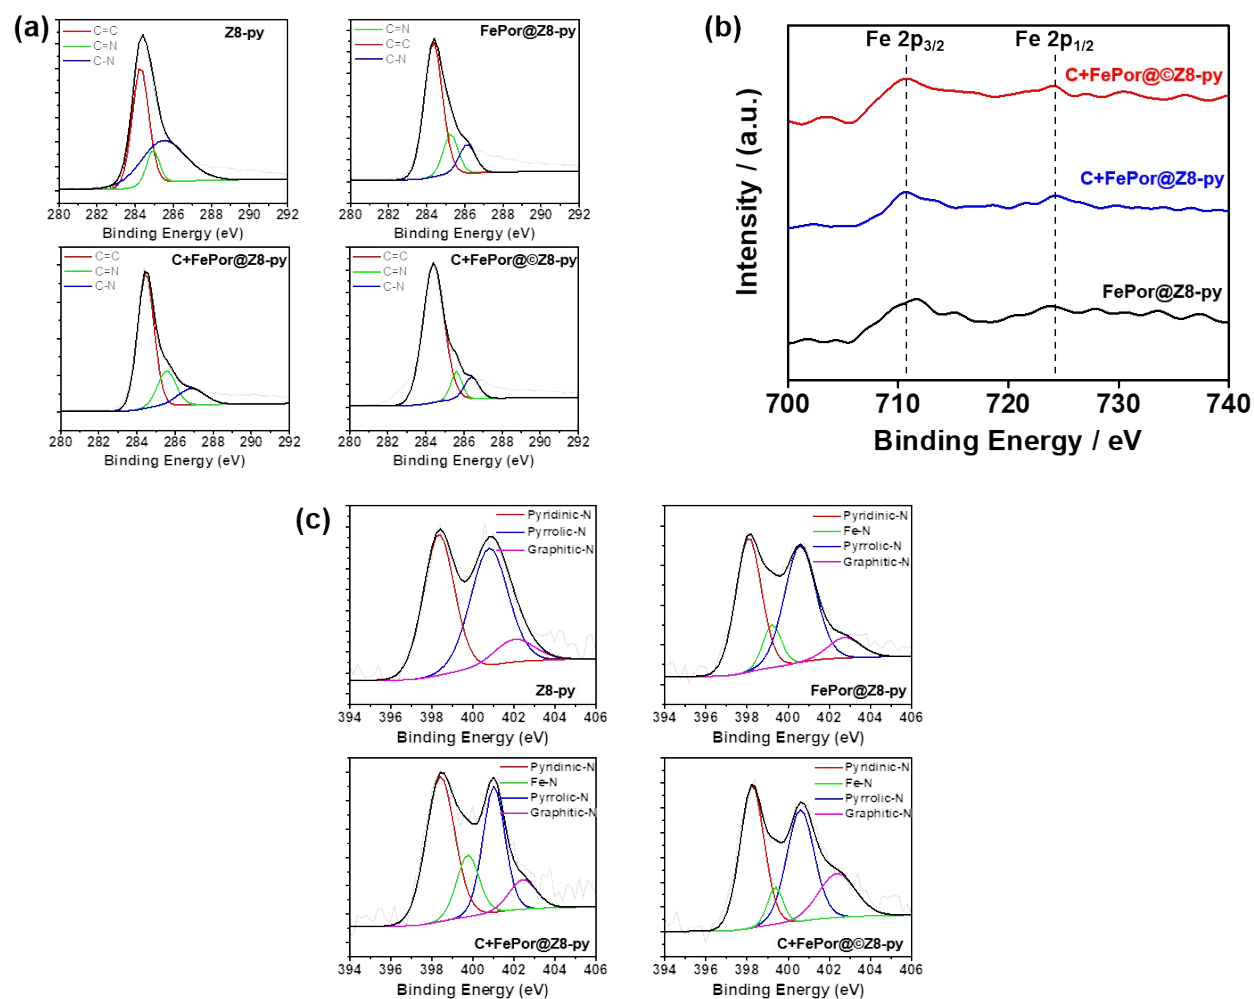

**Fig. S5.** (a) C 1s high-resolution XPS spectra (b) Fe 2p high-resolution XPS spectra. (c) N 1s high-resolution XPS spectra

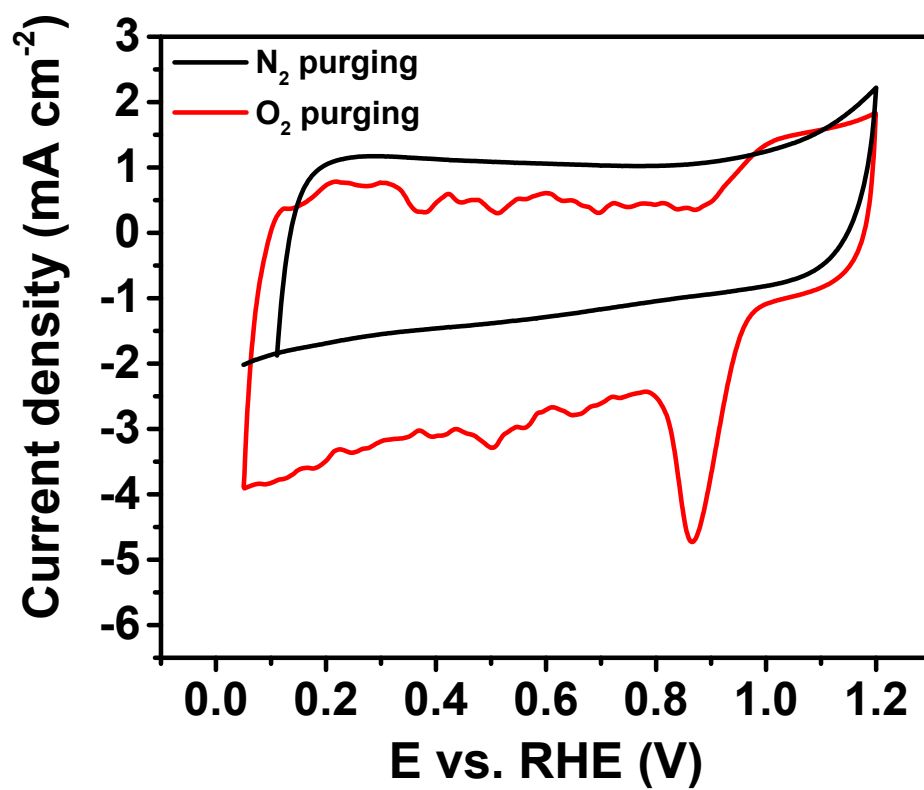

**Fig. S6.** CV curves of C+FePor@Z8-py in N<sub>2</sub>- and O<sub>2</sub>-saturated 0.1M aqueous KOH electrolyte solutions at a scan rate of 50 mV/s.
